# Supplementary material
Source: publisher figshare collection journal article supplement (https://tandf.figshare.com/ndownloader/files/16250201)
Supplement: Supplementary file 1 [file 16250201]

**Online Supplemental Material**

**Abrupt decrease in the diversity of Euglossini bees (Hymenoptera: Apidae) in a montane rainforest**

Alessandra Ribeiro Pintoa, Guilherme do Carmo Silveirab, Maria Cristina Gaglianonec, Leandro Freitasa*

*a Jardim Botânico do Rio de Janeiro (JBRJ), Rua Pacheco Leão, 915, CEP 22460030, Rio de Janeiro, RJ, Brazil; b Instituto Federal de Educação, Ciência e Tecnologia Sudeste de Minas Gerais, Rua Técnico Panamá, 45, CEP 36240-000, Santos Dumont, MG, Brazil; c Universidade Estadual do Norte Fluminense Darcy Ribeiro, Laboratório de Ciências Ambientais, CEP 28013620, Campos dos Goytacazes, RJ, Brazil*

*Corresponding author. Email: [lfreitas.jbot@gmail.com](mailto:lfreitas.jbot@gmail.com)

Figure S1. Climatic data from the Teresópolis automatic station during study time. Monthly averages of minimum (Min) and maximum (Max) temperatures, and monthly rainfall (Rain).


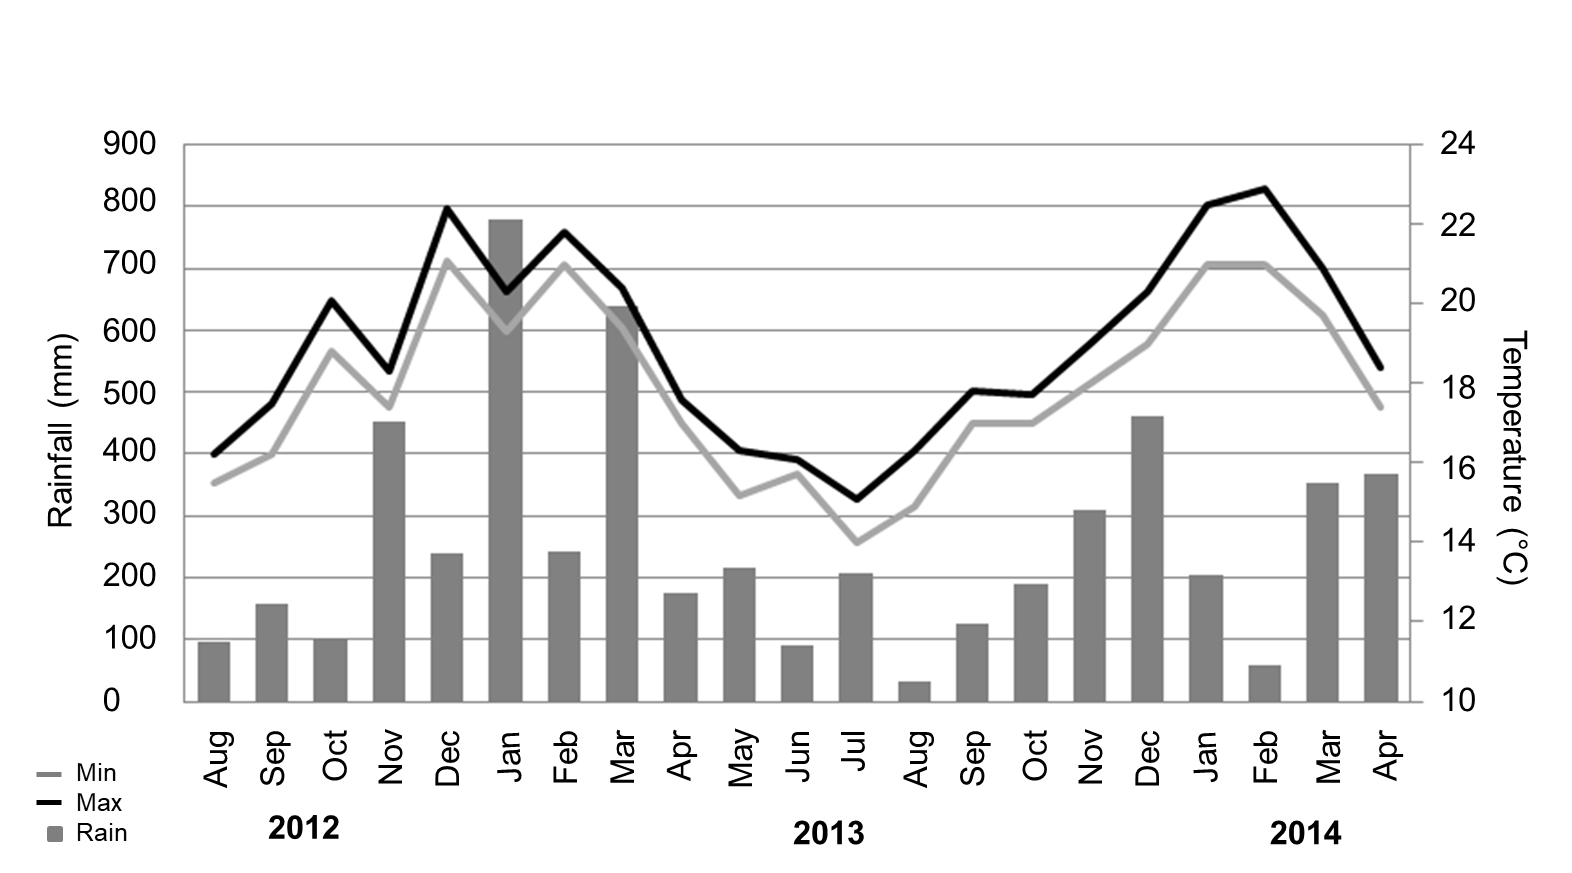


Table S1. Orchid species bearing scent-flowers, probably pollinated by Euglossini males, from the region of the study. Occurrence in the montane forests of the Serra dos Órgãos (“Teresópolis”) and in the study area (“PARNASO”, 900 up 1500 m of altitude).

| Species | Teresópolis | PARNASO 900-1500 m |
| --- | --- | --- |
| *Bifrenaria atropurpurea* Lindl. | X | X |
| *Bifrenaria aureofulva* Lindl. |  |  |
| *Bifrenaria leucorrhoda* Rchb.f. |  |  |
| *Bifrenaria racemosa* (Hook.) Lindl. | X |  |
| *Bifrenaria stefanae* V.P.Castro | X | X |
| *Bifrenaria vitellina* (Lindl.) Lindl. |  |  |
| *Catasetum cernuum* (Lindl.) Rchb.f. |  |  |
| *Cirrhaea dependens* (Lodd.) Loudon |  |  |
| *Cirrhaea loddigesii* Lindl. | X |  |
| *Cirrhaea fuscolutea* Lindl. | X | X |
| *Dichaea anchorifera* Rchb.f. |  |  |
| *Dichaea cogniauxiana* Schltr. | X | X |
| *Dichaea pendula* (Aubl.) Cogn. | X | X |
| *Dichaea trulla* Rchb.f. | X |  |
| *Encyclia oncidioides* (Lindl.) Schltr. | X | X |
| *Encyclia patens* Hook. | X |  |
| *Eulophia alta* (L.) Fawc. & Rendle | X |  |
| *Gongora bufonia* Lindl. |  |  |
| *Neogardneria murrayana* (Gardner ex Hook.) Schltr. |  |  |
| *Notylia lyrata* S.Moore | X |  |
| *Promenaea stapelioides* (Link & Otto) Lindl. | X | X |
| *Promenaea xanthina* Lindl. | X | X |
| *Prosthechea widgrenii* (Lindl.) W.E.Higgins |  |  |
| *Prosthechea fragrans* (Sw.) W.E.Higgins | X | X |
| *Scuticaria hadwenii* (Lindl.) Planch. | X |  |
| *Warrea warreana* (Lodd. ex Lindl.) C.Schweinf. | X | X |
| *Zygopetalum pedicellatum* (Thunb.) Garay | X | X |
